# Supplementary material for: Changes of Microrna Levels in Plasma of Patients with Rectal Cancer during Chemoradiotherapy
Source: PubMed Central journal article supplement (PMC5485964; doi:10.3390/ijms18061140), 2017-05-27
Supplement: ijms-18-01140-s001.pdf [file ijms-18-01140-s001.pdf]

## Supplementary Information

**Table S1.** Demographic and clinical information of the test-set including 17 rectal cancer patients, mean age 62.35, (\* paired pretreatment and post-treatment samples, m = male, f = female, cT = initial clinical T-level, measured by ultrasound and MRI, cN = initial clinical nodal status, measured by ultrasound and MRI, cM = initial clinical metastasis status, determined by imaging techniques, RT = radiotherapy, TRG = tumor regression grade, distant met. = distant metastasis, local = local recurrence, NA = Not available).

| Patient | Sex | Age | cT | cN | cM | Preoperative Therapy    | TRG | Recurrence           |
|---------|-----|-----|----|----|----|-------------------------|-----|----------------------|
| P001    | m   | 70  | 3  | 1  | 0  | 5-FU + RT               | 1   | no                   |
| P002*   | m   | 55  | 3  | 1  | 0  | 5-FU + Oxaliplatin + RT | 2   | local & distant met. |
| P003    | f   | 81  | 3  | 1  | 0  | 5-FU + RT               | 2   | no                   |
| P004    | m   | 66  | 3  | 1  | 0  | 5-FU + Oxaliplatin + RT | 3b  | no                   |
| P005    | m   | 59  | 3  | 1  | 0  | 5-FU + RT               | 3b  | distant met.         |
| P006    | m   | 62  | 3  | 0  | 0  | 5-FU + RT               | 1   | no                   |
| P007    | f   | 58  | 3  | 1  | 0  | 5-FU + RT               | 3a  | no                   |
| P008    | f   | 68  | 3  | 1  | 0  | 5-FU + RT               | 2   | no                   |
| P009    | m   | 63  | 3  | 1  | 0  | 5-FU + RT               | 3   | no                   |
| P010    | f   | 76  | 3  | 0  | 0  | 5-FU + Oxaliplatin + RT | 3b  | no                   |
| P011*   | m   | 65  | 3  | 1  | 0  | 5-FU + Oxaliplatin + RT | 3b  | no                   |
| P012*   | m   | 56  | 3  | 0  | 0  | 5-FU + Oxaliplatin + RT | 3a  | no                   |
| P013    | m   | 53  | 3  | 1  | 0  | 5-FU + Oxaliplatin + RT | 3b  | distant met.         |
| P014    | m   | 56  | 3  | 1  | 0  | 5-FU + RT               | 4   | no                   |
| P015*   | m   | 60  | 2  | 1  | 0  | 5-FU + RT               | 4   | no                   |
| P016    | f   | 63  | 3  | 0  | 0  | 5-FU + RT               | 2   | local & distant met. |
| P017    | m   | 49  | 3  | 0  | 0  | 5-FU + RT               | 1   | distant met.         |

**Table S2.** Demographic and clinical information of the validation-set including 94 patients with rectal cancer, mean age 64.43, (\* paired pretreatment and post-treatment samples, m = male, f = female, cT = initial clinical T-level, measured by ultrasound and MRI, cN = initial clinical nodal status, measured by ultrasound and MRI, cM = initial clinical metastasis status, determined by imaging techniques, RT = radiotherapy, TRG = tumor regression grade, distant met. = distant metastasis, local = local recurrence, NA = not available).

| Patient | Sex | Age | cT | cN | cM | Preoperative Therapy    | TRG | Recurrence           |
|---------|-----|-----|----|----|----|-------------------------|-----|----------------------|
| P018    | m   | 54  | 3  | 1  | 0  | 5-FU + RT               | 3b  | no                   |
| P019    | m   | 72  | 3  | 1  | 0  | 5-FU + Oxaliplatin + RT | 4   | no                   |
| P020    | m   | 57  | 3  | 1  | 0  | 5-FU + Oxaliplatin + RT | 3b  | no                   |
| P021    | m   | 60  | 3  | 0  | 0  | 5-FU + RT               | 2   | no                   |
| P022    | f   | 66  | 3  | 1  | 0  | 5-FU + RT               | 3a  | distant met.         |
| P023    | m   | 42  | 3  | 1  | 1  | 5-FU + Oxaliplatin + RT | 2   | distant met.         |
| P024    | m   | 79  | 3  | 1  | 0  | 5-FU + RT               | 3b  | no                   |
| P025    | m   | 65  | 3  | 1  | 0  | 5-FU + RT               | 2   | no                   |
| P026    | m   | 63  | 3  | 1  | 0  | 5-FU + Oxaliplatin + RT | 3b  | no                   |
| P027    | m   | 76  | 4  | 1  | 0  | 5-FU + RT               | 2   | no                   |
| P028    | f   | 77  | 3  | 1  | 0  | 5-FU + Oxaliplatin + RT | 2   | no                   |
| P029    | m   | 55  | 3  | 1  | 0  | 5-FU + RT               | 3b  | local & distant met. |
| P030    | m   | 61  | 3  | 1  | 0  | 5-FU + Oxaliplatin + RT | 3a  | no                   |
| P031    | f   | 63  | 3  | 1  | 0  | 5-FU + RT               | 3b  | distant met.         |
| P032    | f   | 36  | 3  | 1  | 0  | 5-FU + Oxaliplatin + RT | 3b  | distant met.         |
| P033    | m   | 63  | 3  | 1  | 0  | 5-FU + Oxaliplatin + RT | 2   | no                   |
| P034    | f   | 64  | 3  | 0  | 0  | 5-FU + RT               | 2   | no                   |
| P035    | f   | 75  | 3  | 0  | 0  | 5-FU + RT               | NA  | no                   |
| P036    | m   | 75  | 3  | 0  | 0  | 5-FU + Oxaliplatin + RT | 3b  | distant met.         |
| P037    | m   | 63  | 3  | 0  | 0  | 5-FU + RT               | NA  | no                   |
| P038    | m   | 68  | 3  | 0  | 0  | 5-FU + Oxaliplatin + RT | 2   | distant met.         |
| P039    | m   | 61  | 3  | 1  | 0  | 5-FU + RT               | 3b  | no                   |
| P040    | f   | 55  | 3  | 1  | 1  | 5-FU + RT               | NA  | distant met.         |
| P041    | m   | 79  | 2  | 1  | 0  | 5-FU + RT               | NA  | no                   |
| P042    | f   | 63  | 3  | 0  | 0  | 5-FU + RT               | NA  | no                   |
| P043    | m   | 60  | 3  | 1  | 0  | 5-FU + Oxaliplatin + RT | 3a  | local & distant met. |
| P044    | f   | 85  | 3  | 1  | 0  | 5-FU + RT               | NA  | no                   |
| P045    | m   | 49  | 3  | 0  | 0  | 5-FU + RT               | NA  | no                   |
| P046    | m   | 73  | 2  | 1  | 0  | 5-FU + RT               | NA  | no                   |
| P047    | m   | 54  | 3  | 1  | 0  | 5-FU + RT               | 2   | local & distant met. |
| P048    | m   | 74  | 3  | 1  | 0  | 5-FU + RT               | 2   | no                   |
| P049    | m   | 60  | 3  | 1  | 0  | 5-FU + RT               | 4   | no                   |
| P050    | f   | 76  | 3  | 0  | 0  | 5-FU + RT               | NA  | distant met.         |
| P051    | m   | 65  | 4  | 0  | 0  | 5-FU + RT               | 3a  | no                   |
| P052    | m   | 68  | 3  | 0  | 0  | 5-FU + RT               | NA  | no                   |
| P053    | m   | 62  | 4  | 1  | 0  | 5-FU + RT               | 2   | no                   |
| P054    | f   | 67  | 2  | 1  | 0  | 5-FU + RT               | NA  | distant met.         |
| P055    | m   | 71  | 3  | 0  | 0  | 5-FU + RT               | NA  | no                   |
| P056    | f   | 67  | 4  | 1  | 0  | 5-FU + Oxaliplatin + RT | 2   | no                   |
| P057    | m   | 81  | 3  | 1  | 0  | 5-FU + RT               | NA  | no                   |
| P058    | m   | 75  | 2  | 1  | 0  | 5-FU + RT               | NA  | no                   |
| P059    | f   | 69  | 3  | 1  | 0  | 5-FU + RT               | NA  | no                   |
| P060    | m   | 63  | 4  | 0  | 0  | 5-FU + RT               | 2   | distant met.         |
| P061    | m   | 73  | 3  | 0  | 0  | 5-FU + RT               | NA  | no                   |
| P062    | m   | 63  | 3  | 0  | 0  | 5-FU + RT               | NA  | no                   |

| P063    | m   | 75  | 3  | 1  | 0  | 5-FU + RT               | NA  | no           |
|---------|-----|-----|----|----|----|-------------------------|-----|--------------|
| P064*   | f   | 72  | 3  | 1  | 0  | 5-FU + RT               | 3b  | no           |
| P065*   | m   | 65  | 3  | 1  | 0  | 5-FU + Oxaliplatin + RT | 3b  | distant met. |
| P066*   | m   | 67  | 3  | 1  | 0  | 5-FU + RT               | NA  | no           |
| P067*   | m   | 79  | 3  | 1  | 0  | 5-FU + Oxaliplatin + RT | 2   | no           |
| P068*   | m   | 71  | 3  | 1  | 0  | 5-FU + RT               | 3b  | no           |
| P069*   | m   | 66  | 3  | 1  | 0  | 5-FU + Oxaliplatin + RT | 4   | no           |
| Patient | Sex | Age | uT | uN | cM | Preoperative Therapy    | TRG | Recurrence   |
| P070*   | f   | 47  | 3  | 1  | 0  | 5-FU + Oxaliplatin + RT | 3a  | no           |
| P071*   | m   | 69  | 2  | 1  | 0  | 5-FU + RT               | 1   | no           |
| P072*   | m   | 73  | 3  | 1  | 0  | 5-FU + RT               | 3b  | no           |
| P073*   | m   | 53  | 2  | 1  | 0  | 5-FU + RT               | 3a  | no           |
| P074*   | m   | 58  | 4  | 1  | 0  | 5-FU + RT               | 3a  | no           |
| P075*   | m   | 45  | 3  | 1  | 1  | 5-FU + RT               | NA  | distant met. |
| P076*   | f   | 68  | 2  | 1  | 0  | 5-FU + Oxaliplatin + RT | 4   | no           |
| P077*   | f   | 50  | 3  | 1  | 0  | 5-FU + Oxaliplatin + RT | 1   | local        |
| P078*   | m   | 77  | 3  | 0  | 0  | 5-FU + RT               | NA  | no           |
| P079*   | m   | 53  | 3  | 0  | 0  | 5-FU + RT               | 4   | no           |
| P080*   | f   | 59  | 3  | 1  | 0  | 5-FU + Oxaliplatin + RT | 3b  | no           |
| P081*   | f   | 74  | 3  | 1  | 0  | 5-FU + RT               | 3b  | no           |
| P082*   | f   | 69  | 3  | 1  | 0  | 5-FU + RT               | NA  | no           |
| P083*   | f   | 68  | 3  | 1  | 0  | 5-FU + Oxaliplatin + RT | 2   | no           |
| P084*   | m   | 66  | 4  | 1  | 0  | 5-FU + RT               | 4   | no           |
| P085*   | m   | 61  | 3  | 1  | 0  | 5-FU + Oxaliplatin + RT | 4   | no           |
| P086*   | m   | 41  | 3  | 0  | 0  | 5-FU + Oxaliplatin + RT | 4   | no           |
| P087*   | m   | 76  | 3  | 1  | 0  | 5-FU + RT               | 2   | distant met. |
| P088*   | f   | 59  | 3  | 1  | 1  | 5-FU + Oxaliplatin + RT | 3b  | distant met. |
| P089*   | m   | 68  | 3  | 0  | 1  | 5-FU + Oxaliplatin + RT | 2   | distant met. |
| P090*   | m   | 57  | 3  | 1  | 0  | 5-FU + Oxaliplatin + RT | 4   | no           |
| P091*   | f   | 63  | 3  | 1  | 0  | 5-FU + Oxaliplatin + RT | 3b  | no           |
| P092*   | f   | 68  | 3  | 0  | 0  | 5-FU + RT               | NA  | no           |
| P093*   | m   | 61  | 3  | 0  | 0  | 5-FU + RT               | NA  | no           |
| P094*   | m   | 72  | 3  | 1  | 0  | 5-FU + RT               | 2   | distant met. |
| P095*   | f   | 71  | 3  | 1  | 0  | 5-FU + RT               | 3b  | no           |
| P096*   | m   | 56  | 3  | 1  | 0  | 5-FU + RT               | 3   | no           |
| P097*   | f   | 72  | 3  | 1  | 0  | 5-FU + RT               | NA  | no           |
| P098*   | f   | 51  | 3  | 1  | 0  | 5-FU + Oxaliplatin + RT | 3b  | no           |
| P099*   | f   | 56  | 3  | 1  | 0  | 5-FU + Oxaliplatin + RT | 2   | no           |
| P100*   | m   | 61  | 2  | 1  | 0  | 5-FU + RT               | 1   | no           |
| P101*   | f   | 69  | 4  | 1  | 1  | 5-FU + RT               | 3b  | distant met. |
| P102*   | m   | 59  | 3  | 0  | 0  | 5-FU + RT               | NA  | no           |
| P103*   | m   | 69  | 3  | 0  | 0  | 5-FU + Oxaliplatin + RT | 3b  | no           |
| P104*   | f   | 63  | 3  | 1  | 0  | 5-FU + Oxaliplatin + RT | 3b  | no           |
| P105*   | m   | 53  | 3  | 1  | 0  | 5-FU + Oxaliplatin + RT | 3b  | distant met. |
| P106*   | f   | 58  | 3  | 1  | 0  | 5-FU + RT               | 2   | distant met. |
| P107*   | f   | 52  | 3  | 0  | 0  | 5-FU + Oxaliplatin + RT | 4   | no           |
| P108*   | f   | 50  | 3  | 0  | 0  | 5-FU + RT               | NA  | no           |
| P109*   | m   | 75  | 2  | 1  | 0  | 5-FU + RT               | NA  | distant met. |
| P110*   | m   | 77  | 3  | 1  | 0  | 5-FU + RT               | 3b  | no           |
| P111*   | m   | 67  | 4  | 1  | 0  | 5-FU + Oxaliplatin + RT | 2   | no           |

**Table S3.** Target sequences for semi-quantitative real-time PCR analysis of the 15 upregulated and 15 downregulated miRNAs (tumor tissue vs mucosa tissue, investigated in a previous work – Gaedcke J, Clin Cancer Res, 2012).

| miRNA    | Target Sequence         | Regulation in Tumor Tissue vs Mucosa (Tested in Previous Work) |
|----------|-------------------------|----------------------------------------------------------------|
| miR-17   | CAAAGUGCUUACAGUGCAGGUAG | Upregulated in tumor tissue                                    |
| miR-18a  | UAAGGUGCAUCUAGUGCAGAUAG | Upregulated in tumor tissue                                    |
| miR-18b  | UAAGGUGCAUCUAGUGCAGUUAG | Upregulated in tumor tissue                                    |
| miR-19a  | UGUGCAAUUCUAUGCAAACUGA  | Upregulated in tumor tissue                                    |
| miR-20a  | UAAAGUGCUUAUAGUGCAGGUAG | Upregulated in tumor tissue                                    |
| miR-21   | UAGCUUAUCAGACUGAUGUUGA  | Upregulated in tumor tissue                                    |
| miR-31   | AGGCAAGAUGCUGGCAUAGCU   | Upregulated in tumor tissue                                    |
| miR-106a | AAAAGUGCUUACAGUGCAGGUAG | Upregulated in tumor tissue                                    |
| miR-135b | UAUGGCUUUUCAUCCUAUGUGA  | Upregulated in tumor tissue                                    |
| miR-184  | UGGACGGAGAACUGAUAGGGU   | Upregulated in tumor tissue                                    |
| miR-193a | AACUGGCCUACAAAGUCCAGU   | Upregulated in tumor tissue                                    |
| miR-223  | UGUCAGUUUGUCAAAUACCCCA  | Upregulated in tumor tissue                                    |
| miR-492  | AGGACCUGCGGGACAAGAUUCUU | Upregulated in tumor tissue                                    |
| miR-552  | AACAGGUGACUGGUUAGACAA   | Upregulated in tumor tissue                                    |
| miR-584  | UUAUGGUUUGCCUGGGACUGAG  | Upregulated in tumor tissue                                    |
| miR-1    | UGGAAUGUAAAGAAGUAUGUAU  | Downregulated in tumor tissue                                  |
| miR-143  | UGAGAUGAAGCACUGUAGCUC   | Downregulated in tumor tissue                                  |
| miR-145  | GUCCAGUUUCCAGGAAUCCCU   | Downregulated in tumor tissue                                  |
| miR-192  | CUGACCUAUGAAUUGACAGCC   | Downregulated in tumor tissue                                  |
| miR-194  | UGUAAACAGCAACUCCAUGUGGA | Downregulated in tumor tissue                                  |
| miR-195  | UAGCAGCACAGAAAUAUUGGC   | Downregulated in tumor tissue                                  |
| miR-215  | AUGACCUAUGAAUUGACAGAC   | Downregulated in tumor tissue                                  |
| miR-26a  | UUCAAGUAAUCCAGGAUAGGCU  | Downregulated in tumor tissue                                  |
| miR-26b  | UUCAAGUAAUUCAGGAUAGGU   | Downregulated in tumor tissue                                  |
| miR-29c  | UAGCACCAUUUGAAAUCGGUUA  | Downregulated in tumor tissue                                  |
| miR-30b  | UGUAAACAUCCUACACUCAGCU  | Downregulated in tumor tissue                                  |
| miR-30c  | UGUAAACAUCCUACACUCUCAGC | Downregulated in tumor tissue                                  |
| miR-30e  | UGUAAACAUCCUUGACUGGAAG  | Downregulated in tumor tissue                                  |
| miR-375  | UUUGUUCGUUCGGCUCGCGUGA  | Downregulated in tumor tissue                                  |
| miR-378  | ACUGGACUUGGAGUCAGAAGG   | Downregulated in tumor tissue                                  |
